# Supplementary material for: Identification of copper metabolism-related subtypes and establishment of the prognostic model in ovarian cancer
Source: Front Endocrinol (Lausanne). 2023 Mar 6;14:1145797. doi: 10.3389/fendo.2023.1145797 (PMC10025496; doi:10.3389/fendo.2023.1145797)
Supplement: Supplementary Table 2 — Univariate cox analysis and Kaplan-Meier survival analysis were used to select genes associated with copper metabolism that have prognostic significance for OC. [file Table_2.xls]

id	HR	HR.95L	HR.95H	pvalue	km
FOXO1	1.431916204	1.071005783	1.914447193	0.015396252	0.010204126
JUN	1.49674061	1.078243427	2.077668546	0.015944761	0.004610069
CP	0.862357326	0.761292903	0.976838422	0.019889289	0.006149116
APOA4	0.721155355	0.535080929	0.971937174	0.03180122	0.294300024
COA6	0.653226685	0.427453326	0.998249578	0.049061021	0.021032243
S100A5	0.878387548	0.759122135	1.016390709	0.081578404	0.044046065
STEAP4	1.091410153	0.987716531	1.205989862	0.085922668	0.004237063
AQP1	1.276206588	0.963614922	1.690201364	0.08886668	0.043822044
FOXO3	1.414634411	0.931072738	2.149338538	0.104093661	0.034601044
ATP13A2	1.452801248	0.894479358	2.359620092	0.131215365	0.041937661
SNCA	1.108330055	0.969047434	1.267631973	0.133331566	0.013671707
F8	0.859134887	0.691987489	1.066656213	0.169005806	0.031572493
TFRC	1.282066731	0.895048934	1.836430435	0.175347275	0.007567383
SORD	1.242059386	0.907356507	1.700226433	0.176021428	0.012660589
STEAP3	1.142026315	0.932866209	1.398082695	0.198207519	0.041285342
ALB	0.927350465	0.826300058	1.040758592	0.200089517	0.06317483
AOC2	1.094630062	0.952712561	1.257687808	0.201880261	0.005742151
AQP2	0.927760893	0.823957827	1.044641178	0.215509839	0.039875002
NFE2L2	0.658980725	0.340174092	1.276568693	0.216382185	0.152921996
AP1S1	1.258338957	0.803182837	1.971427748	0.315782643	0.091922725
TMPRSS6	0.952431586	0.862878251	1.051279164	0.333358449	0.029649612
IL1A	0.942223879	0.834005013	1.064485013	0.339044249	0.04694805
LOXL1	1.115660582	0.884800615	1.406755954	0.35483155	0.006127255
CDK1	1.155126367	0.848515433	1.572531119	0.359528842	0.199818217
DCT	1.075432407	0.886502188	1.304627194	0.460651088	0.185378001
STEAP2	0.943770583	0.801650628	1.111086155	0.487069659	0.005460869
CUTC	1.149021366	0.772326616	1.709445296	0.493125055	0.064306776
S100A13	0.871815318	0.585745725	1.29759709	0.499002947	0.208601289
SCO2	0.896878456	0.647686342	1.241945234	0.512268028	0.048283
TP53	0.942384169	0.764984847	1.16092224	0.577060818	0.02054593
HEPH	0.966584806	0.844935025	1.105749153	0.620444296	0.099890512
XAF1	0.96851461	0.850220623	1.103267228	0.630277332	0.156593414
COX17	0.904020866	0.594091873	1.375635257	0.637587275	0.019591286
ABCB6	0.940622883	0.727123653	1.216810104	0.64120015	0.106168942
ATOX1	0.917840229	0.629032419	1.339248438	0.656525396	0.073479026
MOXD1	1.023979274	0.918780235	1.141223454	0.668337536	0.002092216
MT1G	1.034991164	0.877540596	1.220691915	0.682923831	0.222594516
SNCB	1.019179372	0.924776362	1.123219228	0.701667033	0.14754784
AOC1	0.987371296	0.924384928	1.054649471	0.705514215	0.04852703
CCND1	0.964846514	0.794098914	1.172308359	0.718748124	0.007116705
CCS	1.093569542	0.667546197	1.791478026	0.722456957	0.054796978
LCAT	0.954344584	0.729396227	1.248667804	0.733309098	0.128855345
MT1F	1.032079395	0.852050773	1.250146014	0.746802487	0.137557991
SOD3	1.033156623	0.823751297	1.295794752	0.777750074	0.11692383
SNCG	1.022896021	0.85945142	1.217423399	0.798837768	0.032971914
MT1E	1.022896338	0.838729894	1.247501639	0.823130092	0.137172514
ANG	0.988933639	0.814341163	1.200958255	0.91059965	0.28215711
S100A12	1.004101528	0.916783168	1.099736464	0.929733469	0.206311597
F5	0.993459733	0.848324756	1.163425013	0.935097216	0.053876343
MT1H	1.002918242	0.901203507	1.116113055	0.957407087	0.36860436
AOC3	1.002055291	0.892080382	1.125587814	0.972386106	0.160396214
HAMP	1.001790077	0.8874955	1.130803885	0.976915408	0.059367611
MT1X	0.997184961	0.787692587	1.262393302	0.981308298	0.332943637
DBH	1.001386346	0.86679106	1.156881582	0.984991465	0.129896521
