# Supplementary material for: Identification of copper metabolism-related subtypes and establishment of the prognostic model in ovarian cancer
Source: Front Endocrinol (Lausanne). 2023 Mar 6;14:1145797. doi: 10.3389/fendo.2023.1145797 (PMC10025496; doi:10.3389/fendo.2023.1145797)
Supplement: Supplementary Table 4 — 40 prognostically relevant DEGs screened by univariate Cox analysis. [file Table_4.xls]

id	HR	HR.95L	HR.95H	pvalue
SVEP1	1.1259097294629	1.00929316477343	1.25600049930367	0.0335218502738436
FMO2	1.09074716775646	1.0069760949911	1.18148721691279	0.033132719449929
RARRES1	1.14648535207174	1.01406238717289	1.29620098244601	0.0290387550380662
ADH1B	1.08115340483735	1.00825215250349	1.15932575188562	0.0284736790938247
PIEZO2	1.15942732976741	1.01933830874285	1.31876897148062	0.0243545060544643
PTGFR	1.18820312250899	1.06254494906756	1.32872182167829	0.00249662415575416
MEOX2	1.13926003947447	1.0436810211606	1.24359206618519	0.0035424702827263
CCDC80	1.22150811435902	1.04475074499963	1.42817038474134	0.012110575835233
UNC5C	1.16981609935486	1.02325426694208	1.33737014398131	0.02164413439946
CX3CR1	1.15978082710393	1.01621127758078	1.32363377241791	0.0279155164113874
CH25H	1.13546359842019	1.00989627109591	1.2766435724515	0.0336152059934736
PAPPA	1.14308901457349	1.00309684350447	1.30261848963019	0.0448186320957935
LILRA2	1.16537346522327	1.01129189016841	1.3429310831518	0.0344169948562437
TLL1	1.26829233302217	1.12482122090683	1.43006320658318	0.00010429939163662
ZBTB16	1.13189907326794	1.02965965672936	1.24429028921504	0.0103148805306619
BCHE	1.07976967000152	1.00079142719582	1.16498054297088	0.0476611065286886
COL6A6	1.11495700545293	1.01923295807247	1.21967123822166	0.0175055298910892
P2RY8	0.845060661381949	0.726384594665198	0.983125917950462	0.0292295416374771
P2RY14	0.805728604325794	0.695791248568928	0.933036431780413	0.00390170819652115
BDKRB1	1.16864572686607	1.01817775286765	1.34135010421884	0.0266825202388244
SYNC	1.18919513986276	1.02453339933668	1.38032111162876	0.0226849139399314
HS6ST3	1.1535847088744	1.01073085212782	1.31662912806837	0.0341573964035611
SLC22A3	1.15340642683698	1.03190673755461	1.28921184158703	0.0119709582482921
DHRS9	1.12287810430587	1.01230372415007	1.24553057254448	0.0284399129929144
SCG2	1.11599656690636	1.01647728395584	1.22525939045077	0.0212845661467288
RELN	1.10395124259202	1.01451544859633	1.20127135343937	0.0217739634915987
PYHIN1	0.878450656023225	0.779855357983088	0.989511128144827	0.032879119210463
CALB2	1.1195615131666	1.01359129941267	1.23661083366659	0.0260107174552509
ZFHX4	1.22343005944513	1.0834615404517	1.38148061049763	0.00114152956730838
CAMK1G	0.874329960022653	0.772830897527176	0.989159312133132	0.0329173204396479
BNC1	1.12075675344876	1.03628167023253	1.21211803362222	0.00435383104205672
GPR171	0.878185946714569	0.788150232515093	0.978507047502768	0.0185901827154866
IL12A	1.13577464872896	1.00901256433621	1.27846183317254	0.0349826388933296
CADPS	0.885244286737551	0.8048448236952	0.973675203132388	0.0121034104497682
VSTM2L	1.10924802771263	1.01242820560156	1.21532685495785	0.0260791959029998
GAD1	0.88077665501864	0.781580914053691	0.992562001037468	0.0373033663801765
ZFHX4-AS1	1.21762920964774	1.10351371324159	1.34354550776913	8.78967725318074e-05
OGN	1.11018658701602	1.01050025384713	1.21970702461272	0.029438156651994
GFRA1	1.10250319594322	1.01158794460496	1.20158934628238	0.0262597178901886
TENM3	1.1021163190705	1.0102714428758	1.2023109129007	0.0285135712696054
