# Supplementary material for: Identification of copper metabolism-related subtypes and establishment of the prognostic model in ovarian cancer
Source: Front Endocrinol (Lausanne). 2023 Mar 6;14:1145797. doi: 10.3389/fendo.2023.1145797 (PMC10025496; doi:10.3389/fendo.2023.1145797)
Supplement: Supplementary Table 5 — Detailed cohort information for the 2 CM gene clusters by the consensus clustering algorithm. [file Table_5.xls]

ID	CM geneCluster
TCGA_TCGA-04-1331	A
TCGA_TCGA-04-1332	A
TCGA_TCGA-04-1338	A
TCGA_TCGA-04-1341	B
TCGA_TCGA-04-1343	A
TCGA_TCGA-04-1347	B
TCGA_TCGA-04-1350	B
TCGA_TCGA-04-1356	B
TCGA_TCGA-04-1357	B
TCGA_TCGA-04-1361	B
TCGA_TCGA-04-1362	B
TCGA_TCGA-04-1364	B
TCGA_TCGA-04-1365	B
TCGA_TCGA-04-1514	B
TCGA_TCGA-04-1519	B
TCGA_TCGA-04-1530	A
TCGA_TCGA-04-1536	B
TCGA_TCGA-04-1542	B
TCGA_TCGA-04-1648	B
TCGA_TCGA-04-1651	B
TCGA_TCGA-04-1655	B
TCGA_TCGA-09-0364	B
TCGA_TCGA-09-0366	B
TCGA_TCGA-09-0367	B
TCGA_TCGA-09-0369	A
TCGA_TCGA-09-1659	B
TCGA_TCGA-09-1661	B
TCGA_TCGA-09-1662	B
TCGA_TCGA-09-1665	B
TCGA_TCGA-09-1666	B
TCGA_TCGA-09-1667	B
TCGA_TCGA-09-1668	B
TCGA_TCGA-09-1669	B
TCGA_TCGA-09-1670	B
TCGA_TCGA-09-1673	B
TCGA_TCGA-09-2044	B
TCGA_TCGA-09-2045	B
TCGA_TCGA-09-2048	B
TCGA_TCGA-09-2051	B
TCGA_TCGA-09-2053	B
TCGA_TCGA-09-2054	A
TCGA_TCGA-09-2056	B
TCGA_TCGA-10-0927	B
TCGA_TCGA-10-0928	B
TCGA_TCGA-10-0931	B
TCGA_TCGA-10-0933	B
TCGA_TCGA-10-0936	B
TCGA_TCGA-10-0937	B
TCGA_TCGA-10-0938	B
TCGA_TCGA-13-0714	A
TCGA_TCGA-13-0720	B
TCGA_TCGA-13-0724	B
TCGA_TCGA-13-0725	A
TCGA_TCGA-13-0726	B
TCGA_TCGA-13-0727	B
TCGA_TCGA-13-0730	A
TCGA_TCGA-13-0762	B
TCGA_TCGA-13-0765	B
TCGA_TCGA-13-0766	A
TCGA_TCGA-13-0768	A
TCGA_TCGA-13-0795	A
TCGA_TCGA-13-0797	B
TCGA_TCGA-13-0800	B
TCGA_TCGA-13-0804	B
TCGA_TCGA-13-0883	A
TCGA_TCGA-13-0884	A
TCGA_TCGA-13-0885	A
TCGA_TCGA-13-0886	A
TCGA_TCGA-13-0887	B
TCGA_TCGA-13-0888	B
TCGA_TCGA-13-0891	B
TCGA_TCGA-13-0893	A
TCGA_TCGA-13-0897	B
TCGA_TCGA-13-0900	A
TCGA_TCGA-13-0901	A
TCGA_TCGA-13-0905	B
TCGA_TCGA-13-0906	B
TCGA_TCGA-13-0908	A
TCGA_TCGA-13-0911	A
TCGA_TCGA-13-0913	B
TCGA_TCGA-13-0916	B
TCGA_TCGA-13-0920	B
TCGA_TCGA-13-0923	B
TCGA_TCGA-13-0924	A
TCGA_TCGA-13-1403	B
TCGA_TCGA-13-1404	A
TCGA_TCGA-13-1405	A
TCGA_TCGA-13-1407	B
TCGA_TCGA-13-1408	A
TCGA_TCGA-13-1409	B
TCGA_TCGA-13-1410	A
TCGA_TCGA-13-1411	A
TCGA_TCGA-13-1477	B
TCGA_TCGA-13-1483	A
TCGA_TCGA-13-1485	A
TCGA_TCGA-13-1487	A
TCGA_TCGA-13-1488	A
TCGA_TCGA-13-1489	B
TCGA_TCGA-13-1492	B
TCGA_TCGA-13-1495	B
TCGA_TCGA-13-1496	B
TCGA_TCGA-13-1497	A
TCGA_TCGA-13-1498	B
TCGA_TCGA-13-1499	A
TCGA_TCGA-13-1501	A
TCGA_TCGA-13-1505	A
TCGA_TCGA-13-1506	B
TCGA_TCGA-13-1507	A
TCGA_TCGA-13-1509	A
TCGA_TCGA-13-1510	B
TCGA_TCGA-13-1511	A
TCGA_TCGA-13-1512	B
TCGA_TCGA-13-2060	A
TCGA_TCGA-13-A5FT	B
TCGA_TCGA-20-0987	B
TCGA_TCGA-20-0991	B
TCGA_TCGA-20-1682	A
TCGA_TCGA-20-1683	B
TCGA_TCGA-20-1686	B
TCGA_TCGA-20-1687	A
TCGA_TCGA-23-1021	B
TCGA_TCGA-23-1022	B
TCGA_TCGA-23-1023	A
TCGA_TCGA-23-1024	B
TCGA_TCGA-23-1026	A
TCGA_TCGA-23-1027	A
TCGA_TCGA-23-1028	B
TCGA_TCGA-23-1029	B
TCGA_TCGA-23-1030	B
TCGA_TCGA-23-1107	B
TCGA_TCGA-23-1109	A
TCGA_TCGA-23-1110	B
TCGA_TCGA-23-1111	B
TCGA_TCGA-23-1113	B
TCGA_TCGA-23-1114	B
TCGA_TCGA-23-1116	A
TCGA_TCGA-23-1118	B
TCGA_TCGA-23-1119	B
TCGA_TCGA-23-1120	B
TCGA_TCGA-23-1122	A
TCGA_TCGA-23-1123	B
TCGA_TCGA-23-1809	B
TCGA_TCGA-23-2077	B
TCGA_TCGA-23-2078	A
TCGA_TCGA-23-2084	B
TCGA_TCGA-24-0966	B
TCGA_TCGA-24-0968	A
TCGA_TCGA-24-0970	A
TCGA_TCGA-24-0979	B
TCGA_TCGA-24-0982	B
TCGA_TCGA-24-1103	B
TCGA_TCGA-24-1104	B
TCGA_TCGA-24-1105	B
TCGA_TCGA-24-1413	B
TCGA_TCGA-24-1416	B
TCGA_TCGA-24-1417	A
TCGA_TCGA-24-1418	A
TCGA_TCGA-24-1419	B
TCGA_TCGA-24-1422	A
TCGA_TCGA-24-1423	B
TCGA_TCGA-24-1424	A
TCGA_TCGA-24-1425	A
TCGA_TCGA-24-1426	B
TCGA_TCGA-24-1427	A
TCGA_TCGA-24-1428	B
TCGA_TCGA-24-1430	A
TCGA_TCGA-24-1431	A
TCGA_TCGA-24-1434	A
TCGA_TCGA-24-1435	A
TCGA_TCGA-24-1464	B
TCGA_TCGA-24-1467	B
TCGA_TCGA-24-1469	B
TCGA_TCGA-24-1470	B
TCGA_TCGA-24-1471	B
TCGA_TCGA-24-1474	A
TCGA_TCGA-24-1544	B
TCGA_TCGA-24-1546	A
TCGA_TCGA-24-1549	B
TCGA_TCGA-24-1550	A
TCGA_TCGA-24-1551	B
TCGA_TCGA-24-1552	B
TCGA_TCGA-24-1553	B
TCGA_TCGA-24-1557	B
TCGA_TCGA-24-1558	B
TCGA_TCGA-24-1560	B
TCGA_TCGA-24-1562	A
TCGA_TCGA-24-1563	A
TCGA_TCGA-24-1565	B
TCGA_TCGA-24-1567	B
TCGA_TCGA-24-1603	B
TCGA_TCGA-24-1604	B
TCGA_TCGA-24-1616	B
TCGA_TCGA-24-1842	A
TCGA_TCGA-24-1843	B
TCGA_TCGA-24-1844	B
TCGA_TCGA-24-1845	B
TCGA_TCGA-24-1846	A
TCGA_TCGA-24-1847	B
TCGA_TCGA-24-1850	A
TCGA_TCGA-24-1923	A
TCGA_TCGA-24-1924	A
TCGA_TCGA-24-1928	A
TCGA_TCGA-24-1930	A
TCGA_TCGA-24-2020	B
TCGA_TCGA-24-2023	B
TCGA_TCGA-24-2024	B
TCGA_TCGA-24-2026	A
TCGA_TCGA-24-2027	B
TCGA_TCGA-24-2033	A
TCGA_TCGA-24-2035	A
TCGA_TCGA-24-2036	B
TCGA_TCGA-24-2038	B
TCGA_TCGA-24-2254	B
TCGA_TCGA-24-2261	A
TCGA_TCGA-24-2262	A
TCGA_TCGA-24-2267	B
TCGA_TCGA-24-2271	A
TCGA_TCGA-24-2280	A
TCGA_TCGA-24-2281	B
TCGA_TCGA-24-2288	A
TCGA_TCGA-24-2289	A
TCGA_TCGA-24-2290	B
TCGA_TCGA-24-2293	A
TCGA_TCGA-24-2297	B
TCGA_TCGA-24-2298	A
TCGA_TCGA-25-1312	B
TCGA_TCGA-25-1313	A
TCGA_TCGA-25-1315	B
TCGA_TCGA-25-1316	B
TCGA_TCGA-25-1317	A
TCGA_TCGA-25-1318	A
TCGA_TCGA-25-1319	B
TCGA_TCGA-25-1320	A
TCGA_TCGA-25-1321	B
TCGA_TCGA-25-1322	A
TCGA_TCGA-25-1323	B
TCGA_TCGA-25-1326	A
TCGA_TCGA-25-1328	A
TCGA_TCGA-25-1329	A
TCGA_TCGA-25-1623	A
TCGA_TCGA-25-1626	A
TCGA_TCGA-25-1627	B
TCGA_TCGA-25-1628	A
TCGA_TCGA-25-1630	B
TCGA_TCGA-25-1631	B
TCGA_TCGA-25-1632	B
TCGA_TCGA-25-1633	A
TCGA_TCGA-25-1634	B
TCGA_TCGA-25-1635	A
TCGA_TCGA-25-1870	B
TCGA_TCGA-25-1877	A
TCGA_TCGA-25-2042	A
TCGA_TCGA-25-2391	B
TCGA_TCGA-25-2392	B
TCGA_TCGA-25-2393	B
TCGA_TCGA-25-2396	A
TCGA_TCGA-25-2398	A
TCGA_TCGA-25-2399	A
TCGA_TCGA-25-2400	B
TCGA_TCGA-25-2401	A
TCGA_TCGA-25-2404	A
TCGA_TCGA-25-2409	A
TCGA_TCGA-29-1688	A
TCGA_TCGA-29-1690	B
TCGA_TCGA-29-1691	B
TCGA_TCGA-29-1693	A
TCGA_TCGA-29-1694	A
TCGA_TCGA-29-1695	A
TCGA_TCGA-29-1696	B
TCGA_TCGA-29-1697	B
TCGA_TCGA-29-1701	A
TCGA_TCGA-29-1703	B
TCGA_TCGA-29-1705	A
TCGA_TCGA-29-1707	B
TCGA_TCGA-29-1710	A
TCGA_TCGA-29-1711	B
TCGA_TCGA-29-1761	B
TCGA_TCGA-29-1762	B
TCGA_TCGA-29-1763	B
TCGA_TCGA-29-1766	A
TCGA_TCGA-29-1768	A
TCGA_TCGA-29-1769	A
TCGA_TCGA-29-1770	A
TCGA_TCGA-29-1774	B
TCGA_TCGA-29-1776	A
TCGA_TCGA-29-1777	A
TCGA_TCGA-29-1778	B
TCGA_TCGA-29-1781	B
TCGA_TCGA-29-1783	B
TCGA_TCGA-29-1784	B
TCGA_TCGA-29-1785	B
TCGA_TCGA-29-2414	A
TCGA_TCGA-29-2425	B
TCGA_TCGA-29-2427	A
TCGA_TCGA-29-2428	B
TCGA_TCGA-29-A5NZ	A
TCGA_TCGA-30-1714	B
TCGA_TCGA-30-1718	A
TCGA_TCGA-30-1853	B
TCGA_TCGA-30-1857	A
TCGA_TCGA-30-1860	A
TCGA_TCGA-30-1861	A
TCGA_TCGA-30-1862	A
TCGA_TCGA-30-1866	A
TCGA_TCGA-30-1891	A
TCGA_TCGA-30-1892	A
TCGA_TCGA-31-1944	B
TCGA_TCGA-31-1946	A
TCGA_TCGA-31-1950	B
TCGA_TCGA-31-1951	A
TCGA_TCGA-31-1953	A
TCGA_TCGA-31-1956	A
TCGA_TCGA-31-1959	A
TCGA_TCGA-36-1568	B
TCGA_TCGA-36-1569	A
TCGA_TCGA-36-1570	B
TCGA_TCGA-36-1571	B
TCGA_TCGA-36-1574	A
TCGA_TCGA-36-1576	A
TCGA_TCGA-36-1577	B
TCGA_TCGA-36-1580	A
TCGA_TCGA-36-1581	B
TCGA_TCGA-57-1582	A
TCGA_TCGA-57-1583	B
TCGA_TCGA-57-1584	B
TCGA_TCGA-57-1585	A
TCGA_TCGA-57-1586	B
TCGA_TCGA-57-1993	B
TCGA_TCGA-57-1994	B
TCGA_TCGA-59-2348	A
TCGA_TCGA-59-2350	B
TCGA_TCGA-59-2351	B
TCGA_TCGA-59-2352	B
TCGA_TCGA-59-2354	A
TCGA_TCGA-59-2355	A
TCGA_TCGA-59-2363	B
TCGA_TCGA-59-A5PD	B
TCGA_TCGA-5X-AA5U	B
TCGA_TCGA-61-1721	A
TCGA_TCGA-61-1724	A
TCGA_TCGA-61-1725	A
TCGA_TCGA-61-1728	B
TCGA_TCGA-61-1733	A
TCGA_TCGA-61-1736	B
TCGA_TCGA-61-1737	A
TCGA_TCGA-61-1738	B
TCGA_TCGA-61-1741	B
TCGA_TCGA-61-1900	B
TCGA_TCGA-61-1907	B
TCGA_TCGA-61-1910	B
TCGA_TCGA-61-1911	B
TCGA_TCGA-61-1914	B
TCGA_TCGA-61-1918	B
TCGA_TCGA-61-1919	A
TCGA_TCGA-61-1995	B
TCGA_TCGA-61-1998	B
TCGA_TCGA-61-2000	B
TCGA_TCGA-61-2002	A
TCGA_TCGA-61-2003	A
TCGA_TCGA-61-2008	B
TCGA_TCGA-61-2009	A
TCGA_TCGA-61-2012	B
TCGA_TCGA-61-2088	B
TCGA_TCGA-61-2092	B
TCGA_TCGA-61-2097	B
TCGA_TCGA-61-2098	B
TCGA_TCGA-61-2101	A
TCGA_TCGA-61-2102	A
TCGA_TCGA-61-2104	B
TCGA_TCGA-61-2109	B
TCGA_TCGA-61-2110	B
TCGA_TCGA-61-2111	B
TCGA_TCGA-61-2113	A
TCGA_TCGA-OY-A56Q	B
TCGA_TCGA-VG-A8LO	B
TCGA_TCGA-WR-A838	B
GSE63885_GSM1559299	B
GSE63885_GSM1559300	A
GSE63885_GSM1559301	A
GSE63885_GSM1559302	B
GSE63885_GSM1559303	B
GSE63885_GSM1559304	A
GSE63885_GSM1559305	B
GSE63885_GSM1559306	B
GSE63885_GSM1559307	A
GSE63885_GSM1559308	B
GSE63885_GSM1559309	A
GSE63885_GSM1559310	B
GSE63885_GSM1559311	A
GSE63885_GSM1559312	A
GSE63885_GSM1559313	B
GSE63885_GSM1559314	B
GSE63885_GSM1559315	B
GSE63885_GSM1559316	A
GSE63885_GSM1559317	A
GSE63885_GSM1559318	B
GSE63885_GSM1559319	A
GSE63885_GSM1559320	B
GSE63885_GSM1559321	B
GSE63885_GSM1559322	A
GSE63885_GSM1559323	A
GSE63885_GSM1559324	B
GSE63885_GSM1559325	B
GSE63885_GSM1559326	A
GSE63885_GSM1559327	B
GSE63885_GSM1559328	A
GSE63885_GSM1559329	A
GSE63885_GSM1559330	A
GSE63885_GSM1559331	A
GSE63885_GSM1559332	A
GSE63885_GSM1559333	B
GSE63885_GSM1559334	B
GSE63885_GSM1559335	A
GSE63885_GSM1559336	A
GSE63885_GSM1559337	B
GSE63885_GSM1559338	B
GSE63885_GSM1559339	B
GSE63885_GSM1559340	A
GSE63885_GSM1559341	A
GSE63885_GSM1559342	A
GSE63885_GSM1559343	B
GSE63885_GSM1559344	B
GSE63885_GSM1559345	A
GSE63885_GSM1559346	B
GSE63885_GSM1559347	B
GSE63885_GSM1559348	B
GSE63885_GSM1559349	B
GSE63885_GSM1559350	A
GSE63885_GSM1559351	B
GSE63885_GSM1559352	B
GSE63885_GSM1559353	A
GSE63885_GSM1559354	B
GSE63885_GSM1559355	B
GSE63885_GSM1559356	B
GSE63885_GSM1559357	B
GSE63885_GSM1559358	B
GSE63885_GSM1559359	B
GSE63885_GSM1559360	B
GSE63885_GSM1559361	A
GSE63885_GSM1559362	B
GSE63885_GSM1559363	B
GSE63885_GSM1559364	B
GSE63885_GSM1559365	B
GSE63885_GSM1559366	B
GSE63885_GSM1559367	B
GSE63885_GSM1559368	B
GSE63885_GSM1559369	B
GSE63885_GSM1559370	B
GSE63885_GSM1559371	B
GSE63885_GSM1559372	B
GSE63885_GSM1559373	A
GSE63885_GSM1559374	A
GSE63885_GSM1559375	A
GSE63885_GSM1559376	B
GSE63885_GSM1559377	B
GSE63885_GSM1559378	B
GSE63885_GSM1559379	B
GSE63885_GSM1559380	B
GSE63885_GSM1559381	B
GSE63885_GSM1559382	B
GSE63885_GSM1559383	B
GSE63885_GSM1559384	B
GSE63885_GSM1559385	B
GSE63885_GSM1559386	B
GSE63885_GSM1559387	B
GSE63885_GSM1559388	B
GSE63885_GSM1559389	B
GSE63885_GSM1559390	A
GSE63885_GSM1559391	B
GSE63885_GSM1559392	B
GSE63885_GSM1559393	B
GSE63885_GSM1559394	B
GSE63885_GSM1559395	B
GSE63885_GSM1559396	B
GSE63885_GSM1559397	B
GSE63885_GSM1559398	B
GSE63885_GSM1559399	B
